# Supplementary material for: Vibrational infrared and Raman spectra of HCOOH from variational computations
Source: Royal Society of Chemistry journal article supplement (doi:10.1039/d3cp00541k), 2023-01-01
Supplement: d3cp00541k2.pdf [file d3cp00541k2.pdf]

**Supplementary Information to  
Vibrational infrared and Raman spectrum of HCOOH from variational  
computations**

Gustavo Avila,<sup>1</sup> Alberto Martín Santa Daría,<sup>1,2</sup> and Edit Mátyus<sup>1,\*</sup>

<sup>1</sup>*ELTE, Eötvös Loránd University, Institute of Chemistry,  
Pázmány Péter sétány 1/A, 1117 Budapest, Hungary*

<sup>2</sup>*Departamento de Química Física, University of Salamanca, 37008 Salamanca, Spain*

(Dated: April 14, 2023)

---

\* [edit.matyus@ttk.elte.hu](mailto:edit.matyus@ttk.elte.hu)

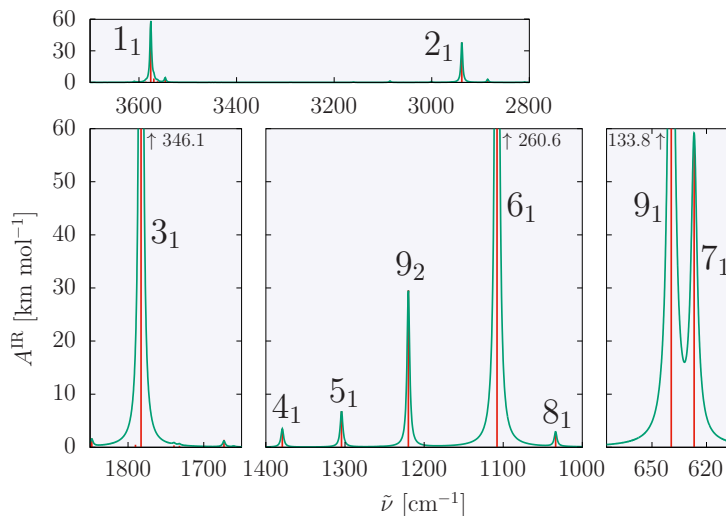

FIG. S1. Simulated vibrational infrared spectrum of HCOOH (transitions from the vibrational ground state) corresponding to the body-fixed frame of Fig. 1. The stick spectrum (in red) has been convoluted (in green) using a Lorentz distribution with full-width-at-half-maximum (FWHM) of  $5 \text{ cm}^{-1}$ . It is worth comparing this figure with Fig. 8 of the manuscript, which corresponds to the Eckart frame of the *trans* equilibrium structure, small differences in the vibrational intensity values can be observed.

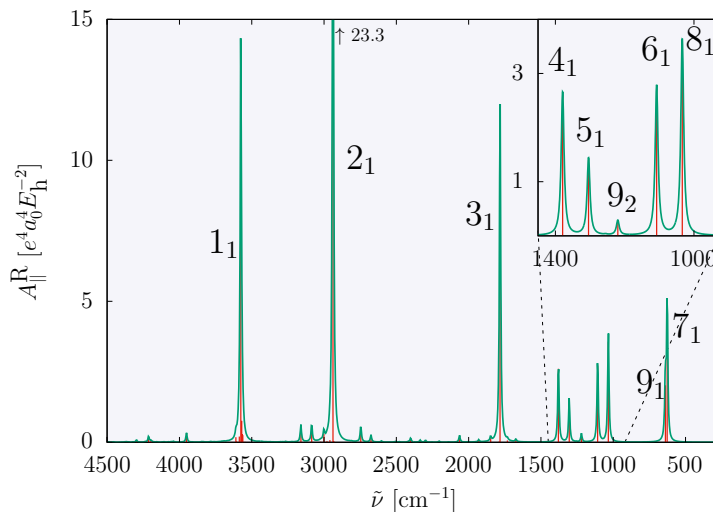

FIG. S2. Parallel Raman spectrum of HCOOH (including transitions from the vibrational ground state) corresponding to the body-fixed frame of Fig. 1 of the manuscript. The stick spectrum (in red) is convoluted (in green) with a Lorentz distribution with FWHM of  $10 \text{ cm}^{-1}$ . It is worth comparing this figure with Fig. 9 of the manuscript, which corresponds to the Eckart frame of the *trans* equilibrium structure. Major (ca. an order-of-magnitude) difference in the  $8_1$  ( $A''$ ) and  $9_1$  ( $A'$ ) activities can be observed, which is discussed in Sec. 5.

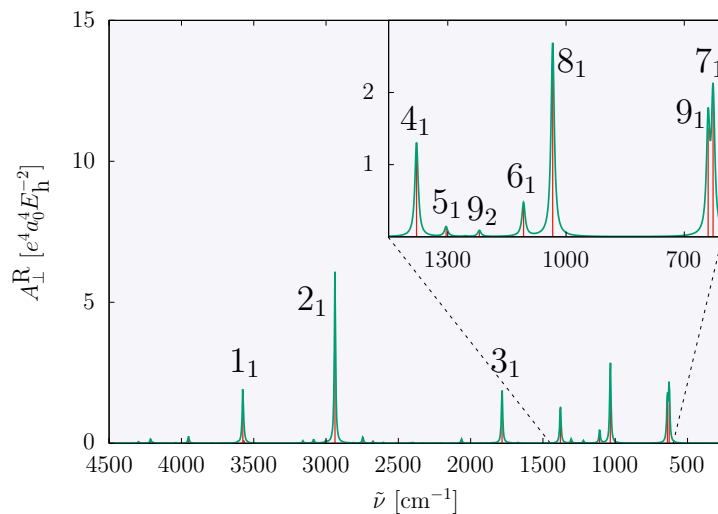

FIG. S3. Perpendicular Raman spectrum of HCOOH (including transitions from the vibrational ground state) corresponding to the body-fixed frame of Fig. 1 of the manuscript. The stick spectrum (in red) is convoluted (in green) with a Lorentz distribution with FWHM of  $10 \text{ cm}^{-1}$ . It is worth comparing this figure with Fig. 10 of the manuscript, which corresponds to the Eckart frame of the *trans* equilibrium structure. Major (ca. an order-of-magnitude) difference in the  $8_1$  ( $A'$ ) and  $9_1$  ( $A''$ ) activities can be observed, which is discussed in Sec. 5.
